# Supplementary material for: New geological constraints on the subsurface structure of the 2022 Fano-Pesaro M w 5.5 earthquake sequence area (Adriatic Sea, Italy) from legacy seismic reflection images and deep well information
Source: Copernicus journal article supplement (doi:10.5194/se-16-1073-2025), 2025-10-13
Supplement: Supplementary file 2 [file supplementary_Tables.pdf › supplementary_Tables.pdf]

**Table. S1.** Geological information and related seismic stratigraphy of interpreted seismic units (SUs).

| Seismic Unit (SU) | Seismic Facies Subunit | Formation   | Lithology                                                                  | Age                    | Reflection Geometry                            | Reflection Amplitude | Reflection Period | Seismic units Example                                                                              |
|-------------------|------------------------|-------------|----------------------------------------------------------------------------|------------------------|------------------------------------------------|----------------------|-------------------|----------------------------------------------------------------------------------------------------|
| SU1               | SU1-a                  | AS          | Fine Sand, Sandy shale                                                     | Pleistocene - Holocene | Continuous-Semi continuous Horizontal Parallel | Low to High          | 20-35 ms          | 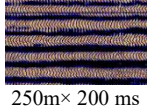 250m× 200 ms   |
|                   | SU1-b                  |             |                                                                            |                        | Discontinuous-Continuous Parallel              | Low to Medium        | 20-30 ms          |  250m× 200 ms   |
|                   | SU1-c                  |             | Shale and Silty shale                                                      |                        | Continuous Parallel                            | High                 | 40-50 ms          |  250m× 150 ms   |
|                   | SFU-d                  |             | Inter bedding of Fine Sand, Shale, Silty Shale                             |                        | Continuous-Semi continuous Parallel            | Low to Medium        | 30-70 ms          |  250m× 875 ms   |
| SU2               | SU2-a                  | PG          | Silty shale and Interbedded shale                                          | Pleistocene            | Continuous Parallel                            | Low Medium High      | 30-60 ms          |  250m× 750 ms  |
|                   | SU2-b                  |             | Fine sand, shaly sand                                                      |                        | Semi continuous-Discontinuous Parallel         | Medium to High       | 30-60 ms          |  250m× 150 ms |
| SU3               | SU3-a                  | PG          | Shale and Silty shale                                                      | Pliocene               | Continuous Horizontal Parallel                 | High                 | 25-50 ms          |  250m× 250 ms |
|                   | SU3-b                  |             | Silt, Sand, silty Marls and silty shale                                    |                        | Discontinuous-Continuous Sub Parallel          | Low to Medium        | 20-50 ms          |  250m× 450 ms |
|                   | SU3-c                  |             | Silty Marls, Shale                                                         |                        | Discontinuous-Sub Parallel                     | Low                  | 30-45 ms          |  250m× 200 ms |
| SU4               | -                      | GS- SCH-BIS | Shales and marls interbedded with siltstones, carbonates, and minor gypsum | Miocene                | Continuous-Discontinuous Parallel Sub Parallel | Medium to High       | 20-40 ms          |  250m× 100 ms |
| SU5               | -                      | SCA-FUC-MAS | Carbonates                                                                 | Mesozoic-Paleogene     | Discontinuous-Continuous Sub Parallel          | Low Medium High      | 20-50 ms          |  250m× 400 ms |

**Table S2.** Seismic interval velocities for the Marche succession (m/s, two-way time). The final column lists the velocity values used for depth conversion in this study. Note: The final velocity model was constructed using average interval velocities derived from well-tie analysis of the Tamara well's sonic log; values derived in this study are marked with an asterisk (\*).

| Age                                         | Lithology                                                                                               | Formation                    | Bally<br>et al.,<br>1986 | Maesano<br>et al.,<br>2013 | Maesano<br>et al., 2023 | Montone<br>&<br>Mariucci.,<br>2023 | This Work |
|---------------------------------------------|---------------------------------------------------------------------------------------------------------|------------------------------|--------------------------|----------------------------|-------------------------|------------------------------------|-----------|
| Holocene                                    | Shale, Silty shale                                                                                      | AS                           | 1962                     | 2010                       | 1849                    | 1800-2750                          | 1976*     |
| Pleistocene                                 | Fine sand, Sandy<br>shale, Shale                                                                        |                              |                          |                            |                         |                                    |           |
| Upper<br>Pliocene                           | Shaly sandstone,<br>shale                                                                               | PG                           | 2767                     | 2980                       |                         |                                    | 2200*     |
| Lower<br>Pliocene                           |                                                                                                         |                              |                          |                            |                         |                                    | 2800*     |
|                                             |                                                                                                         |                              |                          |                            |                         |                                    | 3000*     |
| Upper -<br>Middle<br>Miocene<br>(Messinian) | Shale- Anhydrite                                                                                        | GS                           | 3777                     | 3395                       | 3545±500                | 4200-4900                          | 3400      |
| Lower<br>Miocene                            | Shale- Marl-<br>siltstone±<br>Limestone                                                                 | SCH- BIS                     | 3060                     | 4151                       |                         | 2400-2800                          |           |
| Oligocene                                   | Limestone- Marl                                                                                         | CSS- SCA                     | 3080                     |                            |                         |                                    | 3800      |
| Cretaceous                                  | Pelagic limestones<br>and marly<br>limestones with<br>chert,                                            | SCA                          | 4726                     | 5600                       | 4700±600                | 4900- 5400                         | 4200      |
| Jurassic-<br>Cretaceous                     | Pelagic limestones,<br>cherty limestones<br>and marls                                                   | CDC- FUC                     | 5795                     |                            | 5400±600                |                                    | 5200      |
| Jurassic                                    | Massive or coarsely<br>bedded peritidal<br>limestones                                                   | MAS                          | 6037                     |                            | 5900±500                |                                    | 6000      |
| Triassic                                    | Gypsum–anhydrites<br>and dolostones, with<br>alternating<br>dolostones and<br>packstone-<br>grainstones | Dolomia<br>Principale-<br>BF | 6195                     | 6100                       | 6000±400                |                                    | 6100      |
