# Supplementary material for: New geological constraints on the subsurface structure of the 2022 Fano-Pesaro M w 5.5 earthquake sequence area (Adriatic Sea, Italy) from legacy seismic reflection images and deep well information
Source: Copernicus journal article supplement (doi:10.5194/se-16-1073-2025), 2025-10-13
Supplement: Supplementary file [file se-16-1073-2025-supplement-title-page.pdf › se-16-1073-2025-supplement-title-page.pdf]

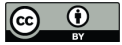

*Supplement of*

**New geological constraints on the subsurface structure of the 2022 Fano-Pesaro  $M_w$  5.5 earthquake sequence area (Adriatic Sea, Italy) from legacy seismic reflection images and deep well information**

**Elham Safarzadeh et al.**

*Correspondence to:* Elham Safarzadeh ([elham.safarzadeh@dottarandi.unip.it](mailto:elham.safarzadeh@dottarandi.unip.it))

- [se-16-1073-2025-supplement-title-page.pdf](#)
- [Suplimentary\\_Figures.pdf](#)
- [supplementary\\_Tables.pdf](#)

The copyright of individual parts of the supplement might differ from the article licence.
